# Supplementary material for: Inhibition of the Staphylococcus aureus c-di-AMP cyclase DacA by direct interaction with the phosphoglucosamine mutase GlmM
Source: PubMed Central journal article supplement (PMC6368335; doi:10.1371/journal.ppat.1007537), 2019-01-22
Supplement: ppat.1007537.s010.pdf [file ppat.1007537.s010.pdf]

**S1 Table: Crystallographic data and refinement statistics**

|                                                     | <b>DacA<sub>CD</sub> (apo)</b> | <b>DacA<sub>CD</sub> (ApCpp)</b> | <b>DacA<sub>CD</sub>-C</b> | <b>GlmM</b>           |
|-----------------------------------------------------|--------------------------------|----------------------------------|----------------------------|-----------------------|
| <b>Data collection</b>                              |                                |                                  |                            |                       |
| Space group                                         | P 21 21 21                     | P 21 21 21                       | P 21 21 21                 | P 21 21 21            |
| Cell dimensions                                     |                                |                                  |                            |                       |
| <i>a</i> , <i>b</i> , <i>c</i> (Å)                  | 54.8 68.19 76.80               | 44.09 80.42 96.19                | 44.86 79.77 98.81          | 88.65 93.88<br>156.31 |
| $\alpha$ , $\beta$ , $\gamma$ (°)                   | 90.00 90.00<br>90.00           | 90.00 90.00 90.00                | 90.00 90.00 90.00          | 90.00 90.00<br>90.00  |
| Resolution (Å)                                      | 68.19 (1.7)*                   | 61.70 (2.6)                      | 98.81 (2.77)               | 93.88 (3.0)           |
| <i>R</i> <sub>merge</sub>                           | 0.077 (0.627)                  | 0.116 (2.115)                    | 0.084 (1.147)              | 0.158 (1.868)         |
| CC <sub>(1/2)</sub>                                 | 0.999 (0.968)                  | 0.997 (0.825)                    | 0.998 (0.892)              | 0.998 (0.842)         |
| <i>I</i> / $\sigma$ ( <i>I</i> )                    | 13.9 (2.0)                     | 10.2 (2.0)                       | 14.2 (2.2)                 | 8.4 (1.8)             |
| Completeness (%)                                    | 99.9 (99.0)                    | 99.3 (99.2)                      | 99.9 (99.9)                | 100.0 (100.0)         |
| Redundancy                                          | 12.2 (10.0)                    | 12.2 (12.3)                      | 12.0 (12.2)                | 12.5 (12.5)           |
| <b>Refinement</b>                                   |                                |                                  |                            |                       |
| Resolution (Å)                                      | 1.7                            | 2.6                              | 2.77                       | 3.0                   |
| No. reflections                                     | 395176                         | 133313                           | 114145                     | 334706                |
| Unique reflections                                  | 32376                          | 10930                            | 9512                       | 26871                 |
| <i>R</i> <sub>work</sub> / <i>R</i> <sub>free</sub> | 0.1735/0.2004                  | 0.2313/0.2576                    | 0.2101/0.2312              | 0.2146/0.2547         |
| R.m.s. deviations                                   |                                |                                  |                            |                       |
| Bond lengths (Å)                                    | 0.006                          | 0.004                            | 0.008                      | 0.004                 |
| Bond angles (°)                                     | 0.962                          | 0.731                            | 1.199                      | 0.789                 |

\* refers to the highest resolution shell
