# Supplementary material for: Inhibition of the Staphylococcus aureus c-di-AMP cyclase DacA by direct interaction with the phosphoglucosamine mutase GlmM
Source: PubMed Central journal article supplement (PMC6368335; doi:10.1371/journal.ppat.1007537), 2019-01-22
Supplement: ppat.1007537.s011.pdf [file ppat.1007537.s011.pdf]

**S2 Table: Theoretical and calculated experimental masses of DacA<sub>CD</sub> and GlmM species**

| <b>Species</b>        | <b>Theoretical Mass (Da)</b> | <b>Calculated Mass (Da)</b> |
|-----------------------|------------------------------|-----------------------------|
| <b>Tetramer</b>       | 138,210                      | 139,003 ± 10.41             |
| <b>GlmM - dimer</b>   | 99,462                       | 99,983 ± 19.86              |
| <b>GlmM – monomer</b> | 49,731                       | 50,302 ± 22.99              |
| <b>DacA – dimer</b>   | 38,748                       | 39,232 ± 20.91              |
| <b>DacA – monomer</b> | 19,374                       | 19,697 ± 59.15              |
| <b>Octamer</b>        | 276,420                      | 277,896 ± 111.24            |
