# Supplementary material for: Inhibition of the Staphylococcus aureus c-di-AMP cyclase DacA by direct interaction with the phosphoglucosamine mutase GlmM
Source: PubMed Central journal article supplement (PMC6368335; doi:10.1371/journal.ppat.1007537), 2019-01-22
Supplement: ppat.1007537.s012.pdf [file ppat.1007537.s012.pdf]

**S3 Table: SAXS data statistics**

|                                | DacA <sub>CD</sub>           | GlmM                        | DacA <sub>CD</sub> /GlmM    |
|--------------------------------|------------------------------|-----------------------------|-----------------------------|
| Beamline                       | B21                          | B21                         | B21                         |
| Wavelength (Å)                 | 1.0                          | 1.0                         | 1.0                         |
| q-range (Å <sup>-1</sup> )     | 0.0032-0.38                  | 0.0032-0.38                 | 0.0032-0.38                 |
| I(0) (cm <sup>-1</sup> )       | 0.048 ± 4.4x10 <sup>-5</sup> | 0.09 ± 6.8x10 <sup>-5</sup> | 0.12 ± 1.2x10 <sup>-4</sup> |
| R <sub>g</sub> (Å)             | 26.3 ± 0.27                  | 36.8 ± 0.26                 | 38.7 ± 0.10                 |
| D <sub>max</sub> (Å)           | 85                           | 121.5                       | 125                         |
| Guinier region                 | 0.2280-1.2928                | 0.2928-1.2840               | 0.2049-1.2919               |
| Porod Volume (Å <sup>3</sup> ) | 64500                        | 128000                      | 204000                      |
| MW Estimate (kDa)              | 40.2                         | 94.2                        | 130.9                       |
| Number of atoms (Dammif)       | 1895                         | 2491                        | 2235                        |
