# Supplementary material for: Inhibition of the Staphylococcus aureus c-di-AMP cyclase DacA by direct interaction with the phosphoglucosamine mutase GlmM
Source: PubMed Central journal article supplement (PMC6368335; doi:10.1371/journal.ppat.1007537), 2019-01-22
Supplement: ppat.1007537.s013.pdf [file ppat.1007537.s013.pdf]

**S4 Table: Collision Cross section (CCS) parameters**

|                       | Theoretical CCS ( $\text{\AA}^2$ )* |              | Charge State | Calculated<br>$^{\text{TW}}\text{CCS}_{\text{N}_2 \rightarrow \text{He}_2}$ ( $\text{\AA}^2$ ) |
|-----------------------|-------------------------------------|--------------|--------------|------------------------------------------------------------------------------------------------|
|                       | IMPACT                              | EM $\cap$ IM |              |                                                                                                |
| <b>Tetramer</b>       | -                                   | 6790         | 21+          | 6690                                                                                           |
|                       |                                     |              | 22+          | 6610                                                                                           |
|                       |                                     |              | 23+          | 6460                                                                                           |
|                       |                                     |              | 24+          | 6340                                                                                           |
| <b>GlmM - Dimer</b>   | 6890                                | 5550         | 18+          | 4750                                                                                           |
|                       |                                     |              | 19+          | 5220                                                                                           |
|                       |                                     |              | 20+          | 5310                                                                                           |
|                       |                                     |              | 21+          | 5420                                                                                           |
| <b>GlmM - Monomer</b> | 3820                                | -            | 13+          | 3210                                                                                           |
|                       |                                     |              | 14+          | 3350                                                                                           |
| <b>DacA - Dimer</b>   | 2870                                | 3200         | 12+          | 2890                                                                                           |
|                       |                                     |              | 13+          | 3080                                                                                           |
| <b>DacA-Monomer</b>   | 1620                                | -            | 8+           | 1810                                                                                           |
|                       |                                     |              | 9+           | 1970                                                                                           |

\*IMPACT values refer to crystal structure data. EM $\cap$ IM values are based on SAXS structural models.
