# Supplementary material for: Inhibition of the Staphylococcus aureus c-di-AMP cyclase DacA by direct interaction with the phosphoglucosamine mutase GlmM
Source: PubMed Central journal article supplement (PMC6368335; doi:10.1371/journal.ppat.1007537), 2019-01-22
Supplement: ppat.1007537.s014.pdf [file ppat.1007537.s014.pdf]

**S5 Table: Bacterial strains used in this study**

| Unique ID                                   | Relevant features                                                                 | Reference           |
|---------------------------------------------|-----------------------------------------------------------------------------------|---------------------|
| <b><i>Escherichia coli</i> strains</b>      |                                                                                   |                     |
| ANG127                                      | XL1-Blue- Cloning strain; TetR –                                                  | Stratagene          |
| ANG191                                      | Protein expression strain –BL21(DE3)                                              | Novagen             |
| ANG1858                                     | XL1-Blue pET28b-His- <i>dacACD</i> ; KanR                                         | This study          |
| ANG1865                                     | BL21 (DE3) pET28b-His- <i>dacACD</i> ; KanR                                       | This study          |
| ANG3994                                     | XL1-Blue pET28b- <i>glmM</i> -His; KanR                                           | This study          |
| ANG3997                                     | BL21 (DE3) pET28b- <i>glmM</i> -His; KanR                                         | This study          |
| ANG4319                                     | XL1-Blue pET28b-His- <i>dacACD</i> -K; KanR                                       | This study          |
| ANG4320                                     | BL21 (DE3) pET28b-His- <i>dacACD</i> -K; KanR                                     | This study          |
| ANG4321                                     | XL1-Blue pET28b-His- <i>dacACD</i> -C; KanR                                       | This study          |
| ANG4322                                     | BL21 (DE3) pET28b-His- <i>dacACD</i> -C; KanR                                     | This study          |
| ANG4066                                     | XL1-Blue pBAD33; CamR                                                             | [1]                 |
| ANG4120                                     | XL1-Blue pBAD33- <i>dacA</i> ; CamR                                               | This study          |
| ANG4121                                     | XL1-Blue pBAD33- <i>dacA-ybbR</i> ; CamR                                          | This study          |
| ANG4122                                     | XL1-Blue pBAD33- <i>dacA-ybbR-glmM</i> ; CamR                                     | This study          |
| ANG4263                                     | XL1-Blue pBAD33- <i>dacA-no-ybbR-glmM</i> ; CamR                                  | This study          |
| ANG5168                                     | XL1-Blue pTrcHis60                                                                | [2]                 |
| ANG5169                                     | XL1-Blue pMLJ4 (GlmM-His <i>E. coli</i> ), AmpR                                   | [3]                 |
| ANG5171                                     | XL1-Blue pMLJ11 (GlmM-His <i>S. aureus</i> ), AmpR                                | Mengin-<br>Lecreulx |
| ANG5172                                     | XL1-Blue pMLD137 (GlmM-His <i>P. aeruginosa</i> ), AmpR                           | [4]                 |
| ANG5174                                     | XL1-Blue pBAD33- <i>dacA</i> , pTrcHis60; CamR, AmpR                              | This study          |
| ANG5175                                     | XL1-Blue pBAD33- <i>dacA</i> pMLJ4 (GlmM-His <i>E. coli</i> ), CamR, AmpR         | This study          |
| ANG5177                                     | XL1-Blue pBAD33- <i>dacA</i> pMLJ11 (GlmM-His <i>S. aureus</i> ), CamR, AmpR      | This study          |
| ANG5178                                     | XL1-Blue pBAD33- <i>dacA</i> pMLD137 (GlmM-His <i>P. aeruginosa</i> ), CamR, AmpR | This study          |
| <b><i>Staphylococcus aureus</i> strains</b> |                                                                                   |                     |
| AH1263                                      | LAC* – ANG1575                                                                    | [5]                 |

Antibiotics were used at the following concentrations: Tetracycline (TetR) 10 µg/ml, Kanamycin (KanR) 30 µg/ml, Ampicillin (AmpR) 100 µg/ml, Chloramphenicol (CamR) 20 µg/ml

1. Guzman LM, Belin D, Carson MJ, Beckwith J. Tight regulation, modulation, and high-level expression by vectors containing the arabinose PBAD promoter. *J Bacteriol.* 1995;177(14):4121-30. PubMed PMID: 7608087; PubMed Central PMCID: PMC177145.
2. Pompeo F, van Heijenoort J, Mengin-Lecreulx D. Probing the role of cysteine residues in glucosamine-1-phosphate acetyltransferase activity of the bifunctional GlmU protein from *Escherichia coli*: site-directed mutagenesis and characterization of the mutant enzymes. *J Bacteriol.* 1998;180(18):4799-803. Epub 1998/09/12. PubMed PMID: 9733680; PubMed Central PMCID: PMC107502.
3. Jolly L, Ferrari P, Blanot D, Van Heijenoort J, Fassy F, Mengin-Lecreulx D. Reaction mechanism of phosphoglucosamine mutase from *Escherichia coli*. *European journal of biochemistry.* 1999;262(1):202-10. Epub 1999/05/07. PubMed PMID: 10231382.
4. Tavares IM, Jolly L, Pompeo F, Leitao JH, Fialho AM, Sa-Correia I, et al. Identification of the *Pseudomonas aeruginosa glmM* gene, encoding phosphoglucosamine mutase. *J Bacteriol.* 2000;182(16):4453-7. Epub 2000/07/27. PubMed PMID: 10913078; PubMed Central PMCID: PMC94616.
5. Boles BR, Thoendel M, Roth AJ, Horswill AR. Identification of genes involved in polysaccharide-independent *Staphylococcus aureus* biofilm formation. *PLoS One.* 2010;5(4):e10146. Epub 2010/04/27. doi: 10.1371/journal.pone.0010146. PubMed PMID: 20418950.
