# Supplementary material for: Inhibition of the Staphylococcus aureus c-di-AMP cyclase DacA by direct interaction with the phosphoglucosamine mutase GlmM
Source: PubMed Central journal article supplement (PMC6368335; doi:10.1371/journal.ppat.1007537), 2019-01-22
Supplement: ppat.1007537.s015.pdf [file ppat.1007537.s015.pdf]

**S6 Table: Primers used in this study**

| Number  | Name                       | Sequence                                                          |
|---------|----------------------------|-------------------------------------------------------------------|
| ANG928  | F-KpnI-02407               | TTTGGTACCTATTACCCGGAGGAGATG                                       |
| ANG1135 | 5-NheI-101AA-SAV2163       | CTAGCTAGCTTTTTTAAAACGCTATACTTCTAATACGTATAG                        |
| ANG1137 | 3-EcoRI-SAV2163            | CGGAATTCTTATTTACACCTTTCTTTTGAAAGCGTG                              |
| ANG1244 | 5-seq-pBAD18               | GCACGGCGTCACACTTTGCTATGCC                                         |
| ANG1245 | 3-seq-pBAD18               | GGCAAATTCTGTTTTATCAGACCGC                                         |
| ANG2342 | 5-NcoI-GlmM                | CACGCCATGGGAAAATATTTTGGTACAGACGGAGTAAGAGG                         |
| ANG2343 | 3-XhoI-GlmM                | CCGCTCGAGGCCGCTGCTGCCGCGCGGCACCAGTTTATCTAATC<br>CCATTTTATCTTGAACC |
| ANG2475 | R_HindIII_dacA             | GCGCAAGCTTTTATTTACACCTTTCTTTTGAAAGCG                              |
| ANG2476 | R_HindIII_dacAybbr         | GCGCAAGCTTTTATTTTACATTTATATAAGCCTTCG                              |
| ANG2477 | R_HindIII_dacAybbr<br>glmM | GCGCAAGCTTTTATTTATCTAATCCCATTTTATCTTG                             |
| ANG2597 | front-YbbR-no start        | CATTTACTTTCTAGCTAATTATTTACACCTTTCTTTTGAAAGCG                      |
| ANG2598 | back-YbbR-no start         | GTGAAATAATTAGCTAGAAAGTAAATGGGGCTTG                                |
| ANG2616 | 3-front-dacA-N166K/T172K   | GGTTTGTTAGGTATAAAGACTTTAATTAAGTTCTTGCG                            |
| ANG2617 | 5-back-dacA-N166K/T172K    | ATTAAAGTCTTTATACCTAACAAACCTTTACATGATGGTGC                         |
| ANG2618 | 3-front-dacA-N166C/T172C   | GGCAGTTAGGTATAAAGACGCAAATTAAGTTCTTGCGAAA<br>TATTTG                |
| ANG2619 | 5-back-dacA-N166C/T172C    | TTTGCCTCTTTATACCTAACTGCCCTTTACATGATGGTGCAATG                      |

Restriction sites in primer sequences are underlined
